# Supplementary material
Source: Springer Nature journal article supplement (https://www.springermedizin.de/resource/supplementary/12883_2010_431_MOESM2_ESM.pdf/9455426)

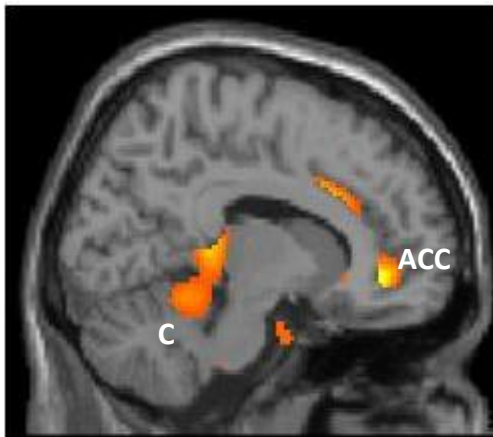

Right (X= 12)

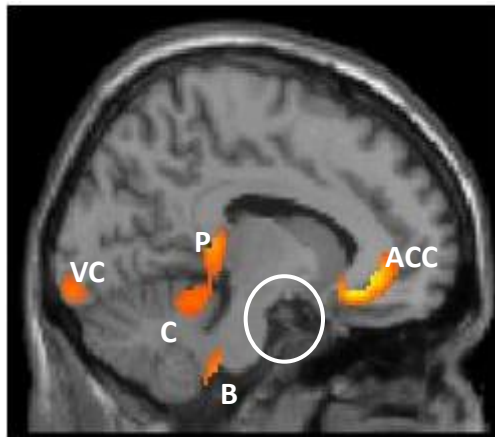

Left (X= -10)

Z score

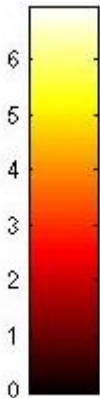

Supplement: MOESM2 [file 9455426]
